# Supplementary material
Source: Springer Nature journal article supplement (https://www.springermedizin.de/resource/supplementary/12885_2014_4959_MOESM3_ESM.pdf/9467818)
Supplement: MOESM3 [file 9467818]

**Table S3.** Microscopically examined tumor cell content (%) of specimens of clear cell renal cell carcinoma tissue from the learning and validation cohorts.

| Learning cohort |                                                 |
|-----------------|-------------------------------------------------|
| ID of tumors    | Microscopically examined tumor cell content (%) |
| L1              | 57.5                                            |
| L2              | 65.3                                            |
| L3              | 69.2                                            |
| L4              | 75.5                                            |
| L5              | 49.1                                            |
| L6              | 73.6                                            |
| L7              | 66.2                                            |
| L8              | 58.3                                            |
| L9              | 90.0                                            |
| L10             | 52.7                                            |
| L11             | 50.7                                            |
| L12             | 65.0                                            |
| L13             | 59.1                                            |
| L14             | 71.0                                            |
| L15             | 60.4                                            |
| L16             | 65.3                                            |
| L17             | 65.6                                            |
| L18             | 60.1                                            |
| L19             | 76.4                                            |
| L20             | 70.1                                            |
| L21             | 66.0                                            |
| L22             | 68.0                                            |
| L23             | 79.2                                            |
| L24             | 69.3                                            |
| L25             | 75.0                                            |
| L26             | 39.0                                            |
| L27             | 47.4                                            |
| L28             | 38.1                                            |
| L29             | 58.5                                            |
| L30             | 58.9                                            |
| L31             | 49.4                                            |
| L32             | 60.3                                            |
| L33             | 63.0                                            |
| L34             | 72.2                                            |
| L35             | 68.3                                            |
| L36             | 52.7                                            |
| L37             | 77.1                                            |
| L38             | 44.0                                            |
| L39             | 73.4                                            |
| L40             | 52.7                                            |
| L41             | 67.9                                            |
| L42             | 77.3                                            |
| L43             | 50.4                                            |
| L44             | 64.2                                            |
| L45             | 65.7                                            |
| L46             | 75.0                                            |
| L47             | 60.5                                            |
| L48             | 61.3                                            |
| L49             | 40.7                                            |
| L50             | 41.6                                            |
| L51             | 61.4                                            |
| L52             | 57.2                                            |
| L53             | 72.8                                            |
| L54             | 39.5                                            |
| L55             | 45.6                                            |
| L56             | 66.4                                            |
| L57             | 51.8                                            |
| L58             | 84.3                                            |
| L59             | 39.4                                            |
| L60             | 47.8                                            |

|      |      |
|------|------|
| L61  | 52.8 |
| L62  | 47.9 |
| L63  | 57.6 |
| L64  | 40.6 |
| L65  | 74.0 |
| L66  | 35.9 |
| L67  | 37.8 |
| L68  | 47.4 |
| L69  | 51.8 |
| L70  | 54.7 |
| L71  | 56.5 |
| L72  | 54.0 |
| L73  | 41.8 |
| L74  | 62.8 |
| L75  | 95.8 |
| L76  | 43.2 |
| L77  | 44.6 |
| L78  | 39.4 |
| L79  | 40.1 |
| L80  | 71.1 |
| L81  | 47.1 |
| L82  | 90.4 |
| L83  | 76.2 |
| L84  | 53.8 |
| L85  | 35.8 |
| L86  | 47.2 |
| L87  | 71.7 |
| L88  | 64.7 |
| L89  | 47.3 |
| L90  | 51.3 |
| L91  | 77.3 |
| L92  | 54.0 |
| L93  | 62.2 |
| L94  | 62.9 |
| L95  | 55.2 |
| L96  | 56.2 |
| L97  | 46.1 |
| L98  | 66.3 |
| L99  | 76.2 |
| L100 | 69.1 |
| L101 | 92.5 |
| L102 | 58.3 |

---

Validation cohort

| ID of tumors | Microscopically examined tumor cell content (%) |
|--------------|-------------------------------------------------|
| V1           | 65.0                                            |
| V2           | 69.2                                            |
| V3           | 57.9                                            |
| V4           | 61.0                                            |
| V5           | 55.8                                            |
| V6           | 67.5                                            |
| V7           | 54.0                                            |
| V8           | 70.8                                            |
| V9           | 84.9                                            |
| V10          | 58.3                                            |
| V11          | 59.7                                            |
| V12          | 81.6                                            |
| V13          | 66.7                                            |
| V14          | 51.6                                            |
| V15          | 71.3                                            |
| V16          | 88.1                                            |
| V17          | 73.2                                            |
| V18          | 63.4                                            |
| V19          | 71.7                                            |
| V20          | 62.8                                            |
| V21          | 76.9                                            |

|     |      |
|-----|------|
| V22 | 59.3 |
| V23 | 48.2 |
| V24 | 73.9 |
| V25 | 80.1 |
| V26 | 79.0 |
| V27 | 62.6 |
| V28 | 57.6 |
| V29 | 64.3 |
| V30 | 74.7 |
| V31 | 60.6 |
| V32 | 62.0 |
| V33 | 38.0 |
| V34 | 59.8 |
| V35 | 76.6 |
| V36 | 60.0 |
| V37 | 44.7 |
| V38 | 68.3 |
| V39 | 58.9 |
| V40 | 81.0 |
| V41 | 71.7 |
| V42 | 47.2 |
| V43 | 47.2 |
| V44 | 70.4 |
| V45 | 95.5 |
| V46 | 68.7 |
| V47 | 48.3 |
| V48 | 53.3 |
| V49 | 41.3 |
| V50 | 80.0 |
| V51 | 82.8 |
| V52 | 67.1 |
| V53 | 70.3 |
| V54 | 30.2 |
| V55 | 59.5 |
| V56 | 64.8 |
| V57 | 74.0 |
| V58 | 77.3 |
| V59 | 68.1 |
| V60 | 68.4 |
| V61 | 63.5 |
| V62 | 69.5 |
| V63 | 55.4 |
| V64 | 73.1 |
| V65 | 70.5 |
| V66 | 84.4 |
| V67 | 56.5 |
| V68 | 62.6 |
| V69 | 46.4 |
| V70 | 66.3 |
| V71 | 66.5 |
| V72 | 53.2 |
| V73 | 47.4 |
| V74 | 51.7 |
| V75 | 79.0 |
| V76 | 60.6 |
| V77 | 82.4 |
| V78 | 66.3 |
| V79 | 68.8 |
| V80 | 61.1 |
| V81 | 73.9 |
| V82 | 72.0 |
| V83 | 54.7 |
| V84 | 80.3 |
| V85 | 61.4 |
| V86 | 62.3 |
| V87 | 66.3 |
| V88 | 81.4 |

|      |      |
|------|------|
| V89  | 68.8 |
| V90  | 57.6 |
| V91  | 74.2 |
| V92  | 58.8 |
| V93  | 46.6 |
| V94  | 83.3 |
| V95  | 70.2 |
| V96  | 81.8 |
| V97  | 64.2 |
| V98  | 84.5 |
| V99  | 53.4 |
| V100 | 75.4 |

---
